# Supplementary material
Source: PubMed Central journal article supplement (PMC2948615)
Supplement: NIHMS218572-supplement-01.pdf [file NIHMS218572-supplement-01.pdf]

## Supplemental Table

Genes identified by microarray analysis as up- or down-regulated in bGH kidneys in comparison to NT kidneys

| Up-regulated genes                                                                                         | Fold Increase |                                                                                                        |       |
|------------------------------------------------------------------------------------------------------------|---------------|--------------------------------------------------------------------------------------------------------|-------|
| M92849:Acidic epididymal glycoprotein 1                                                                    | 26.91*        | X02468:Mouse germline immunoglobulin V(H)II gene H18                                                   | 6.87  |
| X67210:M.musculus rearranged immunoglobulin gamma 2b heavy chain                                           | 23.59         | V00817:Mouse germ line gene fragment for mu-immunoglobulin C-terminus (secreted form)                  | 6.77  |
| X88902:M.musculus mRNA for variable heavy chain                                                            | 20.68         | U30629: anti-DNA antibody Ig kappa chain mRNA, V-J region, hybridoma 84.20                             | 6.77  |
| J00579:Mouse Ig active lambda-1-chain V-region (V-J) gene, 3 end                                           | 16.91         | L43568: antigen, B-cell receptor gene                                                                  | 6.68  |
| AF036736: clone BPS3.19 immunoglobulin heavy chain variable region precursor, gene                         | 16.45         | L28059: Ig B cell antigen receptor gene                                                                | 6.68  |
| Z22111:M.domesticus IgG variable region                                                                    | 14.32         | X02466:Mouse germline immunoglobulin V(H)II gene H17                                                   | 6.63  |
| AF036738: clone BPS5.16 immunoglobulin heavy chain variable region precursor, gene                         | 14.03         | U62386: immunoglobulin heavy and light chain variable region mRNA                                      | 6.59  |
| M13284:Mouse Ig active kappa-chain V-region (V139-J1) mRNA from anti-DNP specific hybridoma TF5-139        | 13.83         | AI850558:UI-M-BG1-aij-e-07-0-UI.s1 cDNA, 3                                                             | 6.32  |
| U10410: recombinant antineuraminidase single chain Ig VH and VL domains mRNA                               | 13.55         | X81627:M.musculus 24p3 gene                                                                            | 6.23  |
| AF042798: immunoglobulin heavy chain gene, CDR3 region                                                     | 13.45         | AJ235940: IgVk aj4 gene                                                                                | 6.06  |
| L33954: clone BPS3.23 germline Ig variable region heavy chain precursor gene                               | 13.00         | X00652:Mouse DNA for Ig-kappa light chain V-J kappa 5 joining region (cell line CH2)                   | 5.98  |
| AF059706: clone N1.1.b immunoglobulin heavy chain VDJ region gene                                          | 12.73         | X16740:Mouse immunoglobulin heavy chain variable gene from a transferrin activated hybridoma cell line | 5.94  |
| L33937: clone CPS4.3 germline Ig variable region heavy chain precursor gene                                | 12.47         | U19315: immunoglobulin kappa light chain variable region mRNA, clone MRL1-46                           | 5.94  |
| X67210:M.musculus rearranged immunoglobulin gamma 2b heavy chain                                           | 11.08         | U55641: anti-DNA immunoglobulin light chain IgG, antibody 423p.176                                     | 5.82  |
| D14625:Immunoglobulin heavy chain 8 (heavy chain of IgG3)                                                  | 10.85         | AB017349: mRNA for immunoglobulin light chain V region                                                 | 5.78  |
| L33943: clone CPS1.13 germline Ig variable region heavy chain precursor pseudogene                         | 10.78         | X97227:M.musculus mRNA for cell surface glycoprotein CD53                                              | 5.74* |
| AF065324: clone X1AC1701 immunoglobulin heavy chain variable region (Vh186.2/Jh2) mRNA                     | 10.78         | AF045026: hybridoma WLA-2C4 immunoglobulin kappa light chain variable region (V kappa) gene            | 5.66  |
| L33952: clone BPS3.24 germline Ig variable region heavy chain precursor gene                               | 10.20         | AI787317:uj66c05.x1 cDNA, 3                                                                            | 5.62  |
| AV370035:AV370035 cDNA, 3                                                                                  | 9.78          | AB006361: mRNA for prostaglandin D synthetase                                                          | 5.54* |
| X94419:M.musculus mRNA (3C10) for IgA V-D-J-heavy chain                                                    | 9.58          | M19681:Small inducible cytokine A2                                                                     | 5.43  |
| X02463:Mouse germline immunoglobulin V(H)II gene H8                                                        | 9.32          | X00651:Mouse DNA for Ig-kappa light chain V-J kappa 5 joining region                                   | 5.39  |
| AF025445: clone BHS2.19 immunoglobulin heavy chain variable region precursor gene                          | 8.94          | D14625:Immunoglobulin heavy chain 8 (heavy chain of IgG3)                                              | 5.28  |
| AF042086: immunoglobulin heavy chain V-DSP2.7-JH2 region (Igh) gene                                        | 8.28          | L02918:Mouse procollagen type V alpha 2 (Col5a-2) mRNA                                                 | 5.24  |
| U55576: anti-DNA immunoglobulin light chain IgM mRNA, antibody 363p.168                                    | 8.22          | AF045024: hybridoma BDI-1 immunoglobulin kappa light chain variable region (V kappa) gene              | 5.10  |
| AB007986: mRNA for single chain antibody ScFv                                                              | 8.11          | X94418:M.musculus mRNA (2F7) for IgA V-D-J-heavy chain                                                 | 4.99  |
| M15520:Mouse Ig V-kappa10-Ars-A kappa chain gene                                                           | 8.00          | AF044077: immunoglobulin kappa light chain variable region gene                                        | 4.92  |
| K02782:Mouse complement component C3 mRNA, alpha and beta subunits                                         | 7.84          | M55561:CD80 antigen                                                                                    | 4.79* |
| X51547:Mouse Lzp-s mRNA for lysozyme P (EC 3.2.1.17)                                                       | 7.52*         | U60442: Ig kappa light chain mRNA                                                                      | 4.66  |
| L28060: Ig B cell antigen receptor gene                                                                    | 7.52          | U30241: anti-DNA antibody Ig kappa chain mRNA, V-J region, hybridoma 84.15                             | 4.63  |
| J00592:Mouse germline Ig lambda-2-chain V-region (V-J) gene, 5 end                                         | 7.31          | X16678:Immunoglobulin kappa chain variable 20 (V20 family)                                             | 4.53  |
| M15593:Mouse Ig kappa chain 7B6 mRNA, V-region (VJ5) of monoclonal phOx-specific antibody from a hybridoma | 7.06          | L14553: Ig light chain V-region CC49 rearranged gene, exons 1 and 2                                    | 4.41  |
|                                                                                                            |               | AI840339:UI-M-AJ0-abd-g-01-0-UI.s2 cDNA, 3                                                             | 4.32  |
|                                                                                                            |               | M80423:Mus castaneus IgK chain gene, C-region, 3 end                                                   | 4.26  |
|                                                                                                            |               | D00073:Transthyretin                                                                                   | 4.20^ |
|                                                                                                            |               | AB007599: mRNA for MD-1                                                                                | 4.20  |



|                                                               |                    |                                                        |                    |
|---------------------------------------------------------------|--------------------|--------------------------------------------------------|--------------------|
| L00919:Erythrocyte protein band 4.1                           | -2.55 <sup>^</sup> | M31680:Growth hormone receptor                         | -2.30 <sup>^</sup> |
| M81591:Membrane metallo endopeptidase                         | -2.53 <sup>^</sup> | U09504:Thyroid hormone receptor alpha                  | -2.28              |
| M32352:Mouse renin (Ren-1-d) gene                             | -2.46              | AW046627:UI-M-BH1-ald-c-09-0-UI.s1 cDNA, 3             | -2.28              |
| AW122615:UI-M-BH2.2-aol-b-06-0-UI.s1 cDNA, 3                  | -2.45              | AW124582:UI-M-BH2.1-apt-e-11-0-UI.s1 cDNA, 3           | -2.20              |
| AF052453:3 -phosphoadenosine 5 -<br>phosphosulfate synthase 2 | -2.43              | AW125222:UI-M-BH2.1-aps-c-12-0-UI.s1 cDNA, 3           | -2.17              |
| L42996: nuclear-encoded mitochondrial<br>acyltransferase mRNA | -2.41 <sup>*</sup> | U35374: purine nucleoside phosphorylase (Np-b)<br>mRNA | -2.14              |

---

\*Significant difference shown by real-time RT/PCR (n=5-6; Table 2)

<sup>^</sup>Non-significant difference shown by real-time RT/PCR (n=5-6)
